# Supplementary material for: Effect of spray-drying and cryo-milling on the CO2absorption performance of C60cross-linked polyethyleneimine
Source: Royal Society of Chemistry journal article supplement (doi:10.1039/c4ta06936f), 2015-01-01
Supplement: c4ta06936f1.pdf [file c4ta06936f1.pdf]

Electronic Supplementary Information

## Effect of spray-drying and cryo-milling on the CO<sub>2</sub> absorption performance of polyethyleneimine-functionalized C<sub>60</sub>

Enrico Andreoli<sup>a,b</sup> and Andrew R. Barron<sup>\*a,b,c</sup>

<sup>a</sup> Department of Chemistry, Rice University, Houston, TX 77005, USA. Tel: +1 713 348 5610; E-mail: arb@rice.edu

<sup>b</sup> Energy Safety Research Institute, College of Engineering, Swansea University, Singleton Park, Swansea SA2 8PP, Wales, UK

<sup>c</sup> Department of Mechanical Engineering and Materials Science, Rice University, Houston, TX 77005, USA.

### Spray-drying

The components of the spray-drying equipment are shown in Fig. S1. The air brush (a) had a nozzle with a diameter of 0.3 mm and a dual action trigger that allowed controlling both PEI/C<sub>60</sub> solution and N<sub>2</sub> flows. All spray-dried samples were prepared with solution and N<sub>2</sub> fully open flows. The N<sub>2</sub> pressure was set in the range of 10-60 psi using a gas cylinder regulator. The two-stage oven (b) was a Nanotech Innovations SSP-354 with two temperature-controlled sections. The temperature of the first section was set between T<sub>1</sub> = 250-310 °C for a fast evaporation of the solvents, followed by a second section at T<sub>2</sub> = 100 °C to fully dry the product. The collecting unit (c) was composed of a metal mesh (50 US Mesh), an o-ring, and a two-part enclosure with a sealing clamp. The spray-dried PEI-C<sub>60</sub> was collected on the metal mesh as brown powder (d), the powder was removed in ethanol using bath sonication, filter on a 0.45 pore μm PTFE membrane and let dry.

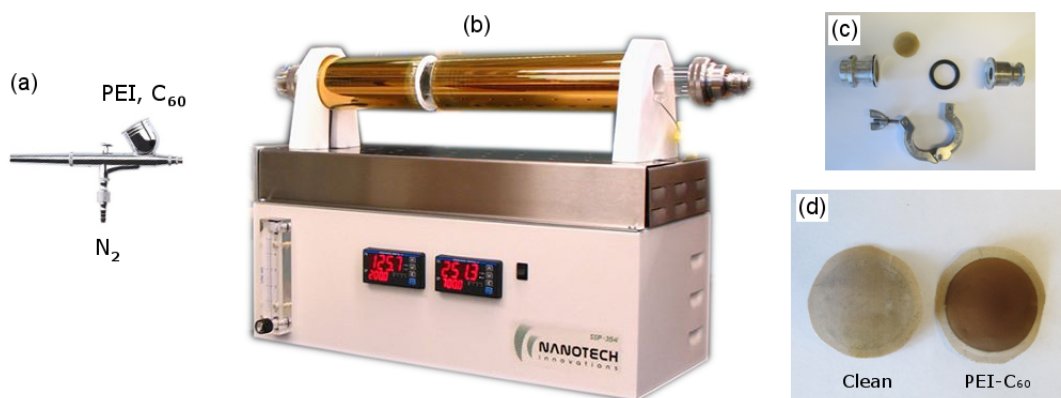

**Figure S1** Components of the spray-drying equipment.

The experimental conditions used in the preparation with the absorption performance and characteristics of the spray-dried products are summarized in Table S1.

**Figure S1** Preparation, characteristics and wet CO<sub>2</sub> absorption performance of the spray-dried PEI-C<sub>60</sub> products.

| Sample # | C <sub>60</sub> (mg) / Toluene (mL) | PEI (mg) / CHCl <sub>3</sub> (mL) | T <sub>1</sub> (°C) | T <sub>2</sub> (°C) | P(N <sub>2</sub> ) (psi) | CO <sub>2</sub> + H <sub>2</sub> O Uptake (wt%) |                     | Aspect           |
|----------|-------------------------------------|-----------------------------------|---------------------|---------------------|--------------------------|-------------------------------------------------|---------------------|------------------|
|          |                                     |                                   |                     |                     |                          | @ 90 °C                                         | from 90 °C to 25 °C |                  |
| 1        | 10 / 5                              | 25 / 5                            | 280                 | 100                 | 60                       | 12.1                                            | 12.3                | Fine powder      |
| 2        | 10 / 5                              | 50 / 5                            | 280                 | 100                 | 60                       | 12.3                                            | 14.7                | Fine powder      |
| 3        | 10 / 5                              | 75 / 5                            | 280                 | 100                 | 60                       | 2.6                                             | 8.5                 | Clusters         |
| 4        | 10 / 5                              | 100 / 5                           | 280                 | 100                 | 60                       | -                                               | -                   | Sticky           |
| 5        | 10 / 5                              | 50 / 5                            | 250                 | 100                 | 60                       | -                                               | -                   | Sticky           |
| 6        | 10 / 5                              | 50 / 5                            | 310                 | 100                 | 60                       | 12.7                                            | 18.2                | Very fine powder |
| 7        | 10 / 5                              | 50 / 5                            | 310                 | 100                 | 10                       | 8.2                                             | 12.7                | Sticky           |
| 8        | 10 / 5                              | 50 / 5                            | 280                 | 100                 | 10                       | 13.9                                            | 13.1                | Fine powder      |
| 9        | 10 / 5                              | 50 / 5                            | 280                 | 100                 | 5                        | 11.5                                            | 12.7                | Powder           |
| 10       | 5 / 5                               | 25 / 5                            | 280                 | 100                 | 10                       | 14.2                                            | 12.0                | Very fine powder |
| 11       | 5 / 5                               | 25 / 5                            | 310                 | 100                 | 10                       | 11.4                                            | 8.0                 | Fine powder      |
| 12       | 7.5 / 5                             | 37.5 / 5                          | 310                 | 100                 | 10                       | 14.0                                            | 12.0                | Fine powder      |
| 13       | 10 / 12                             | 90 / 3                            | Ultrasonication     |                     |                          | 14.2                                            | 7.3                 | Clusters         |

### Cryo-milling

The PEI-C<sub>60</sub> cryo-ground samples were prepared as follows.

*Ultrasonic synthesis (as prepared sample):* In a glass vial, 10 mg of C<sub>60</sub> were dissolved with 12 mL of toluene to which was added 0.5 mL of Et<sub>3</sub>N. In another vial, 0.1 g of PEI was dissolved with 3 mL of CHCl<sub>3</sub>. The PEI solution was added with a syringe to the C<sub>60</sub> one drop-by-drop which was immersed in an ice-bath and probe-sonicated at 150 W. A brown precipitate of PEI-C<sub>60</sub> was formed. This procedure was repeated as many times as necessary in order to collect enough material for the cryo-milling. Such material was then filtered, washed with CHCl<sub>3</sub> in excess, and let dry on a 0.45 μm pore PTFE filter. A reddish-brown rubbery and clustery material was collected.

*Stir bar synthesis (as prepared sample):* 0.5 g of C<sub>60</sub> was dissolved in 600 mL of toluene in a 1 L round-bottomed flask to which 25 mL Et<sub>3</sub>N and a magnetic stirring bar were also added. In a separate flask, 5.0 g of PEI was dissolved in 150 mL of CHCl<sub>3</sub>. The PEI solution was transferred in the C<sub>60</sub> flask using a 50 mL glass syringe kept vertical to allow free flowing by gravity while vigorously stirring. The PEI-C<sub>60</sub> precipitated from the reaction mixture was filtered, washed with CHCl<sub>3</sub> in excess, and let dry on a 0.45 μm pore PTFE filter. A cake of brown hard material was collected.

*Cryo-ground sample:* PEI-C<sub>60</sub> from the ultrasonic or stir bar synthesis was transferred to the grinding vial in which a stainless still impactor was previously placed. The material covered the impactor up to about 2/3 of its height. The vial was then loaded in the cryo-grinder filled with liquid nitrogen beforehand. The grinder was closed and the vial left immersed in liquid nitrogen for about 30-60 min. prior to the starting of the milling procedure. The procedure consisted in two parts: 1) 3 min. milling at 10 counts per second (CPS), and 2) 3 min. cooling to avoid heating the material, this cycle was repeated three times. The vial was then removed from the grinder and before opening it, allow to reach room temperature in order to avoid water condensation on the final product.

*Dried and cryo-ground sample:* PEI-C<sub>60</sub> from the ultrasonic synthesis was placed to dry at 90 °C under N<sub>2</sub> flow. The dried material was then processed following the same procedure described for the cryo-grinded sample above.

The absorption performance of the cryo-milled products are summarized in Table S2.

**Table S2** Wet CO<sub>2</sub> absorption performance of the cryo-milled PEI-C<sub>60</sub> products.

| Sample                              | CO <sub>2</sub> + H <sub>2</sub> O Uptake (wt%) |                     |
|-------------------------------------|-------------------------------------------------|---------------------|
|                                     | @ 90 °C                                         | from 90 °C to 25 °C |
| Ultrasonic synthesis                | 12.4                                            | 7.8                 |
| Stir bar synthesis                  | 12.1                                            | 9.6                 |
| Ultrasonic + Cryo-grinding          | 13.4                                            | 6.2                 |
| Ultrasonic + Drying + Cryo-grinding | 5.4                                             | 5.4                 |
| Stir bar + Cryo-grinding            | 11.0                                            | 17.6                |
